# Supplementary material for: Exploring reaction mechanisms for CO2 reduction on carbides
Source: Royal Society of Chemistry journal article supplement (doi:10.1039/d4ta05592f), 2024-01-01
Supplement: d4ta05592f1.pdf [file d4ta05592f1.pdf]

## Exploring reaction mechanisms for CO<sub>2</sub> reduction on Carbides

### Supplementary Information (SI)

Naveed Ashraf, Atef Iqbal, and Younes Abghoui

Science Institute of the University of Iceland

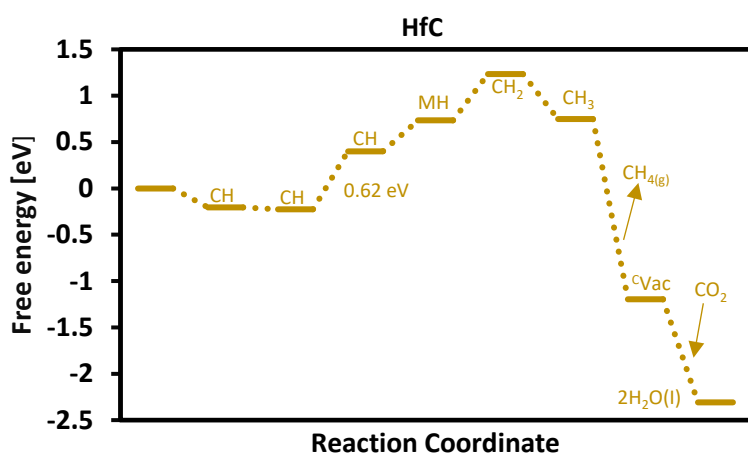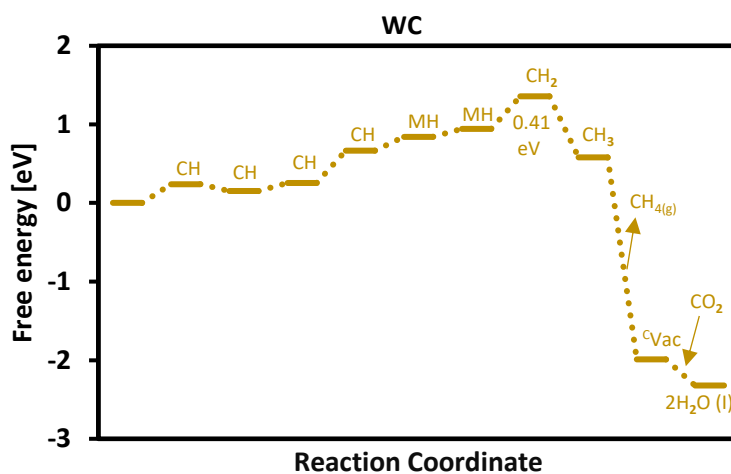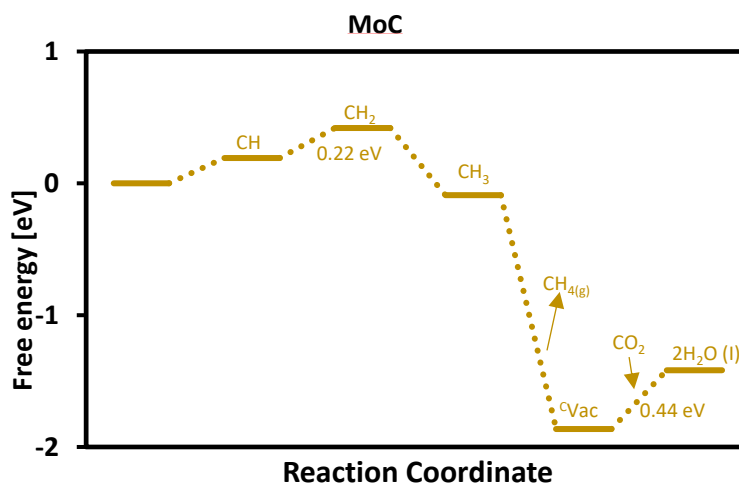

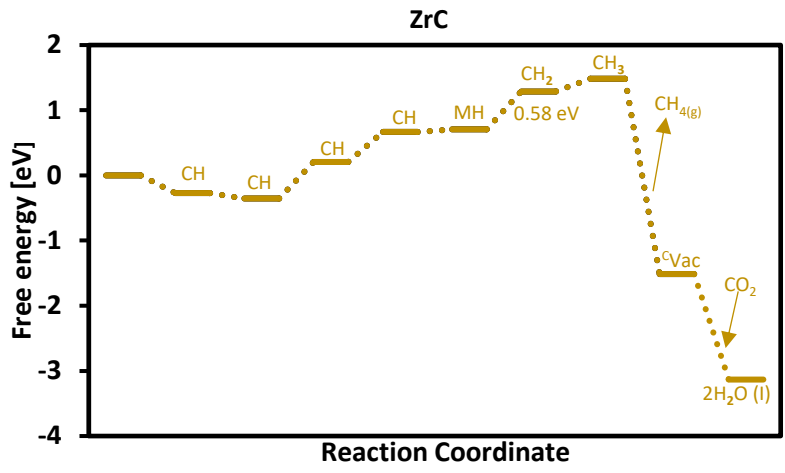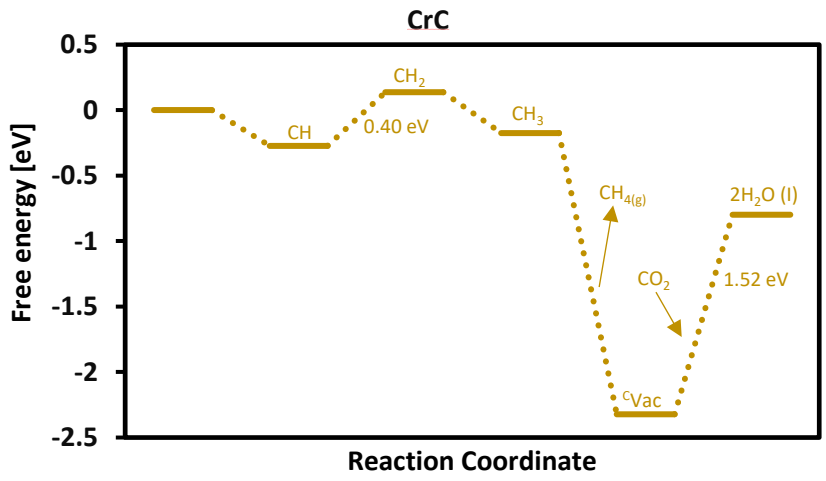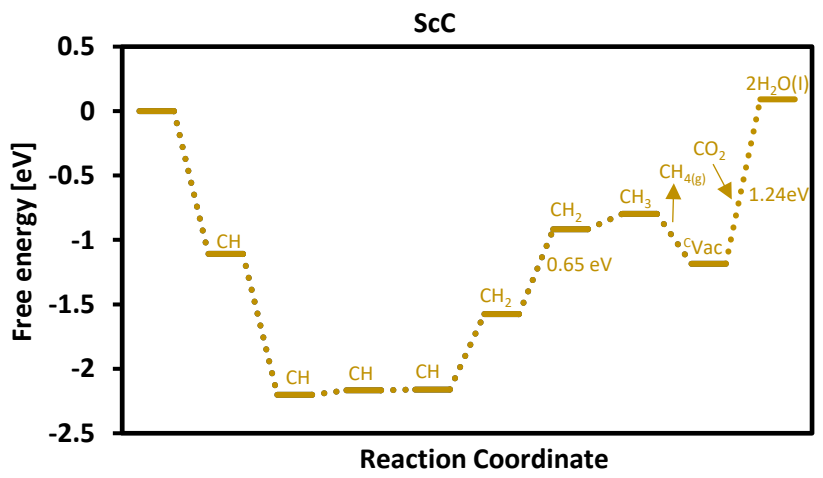

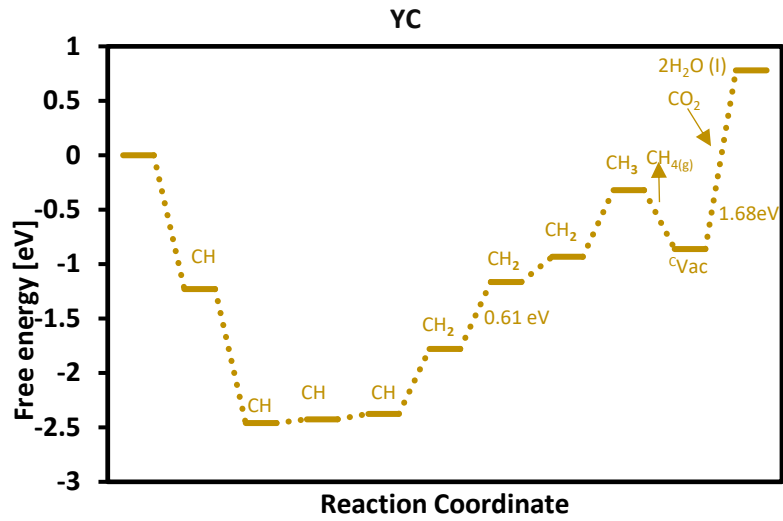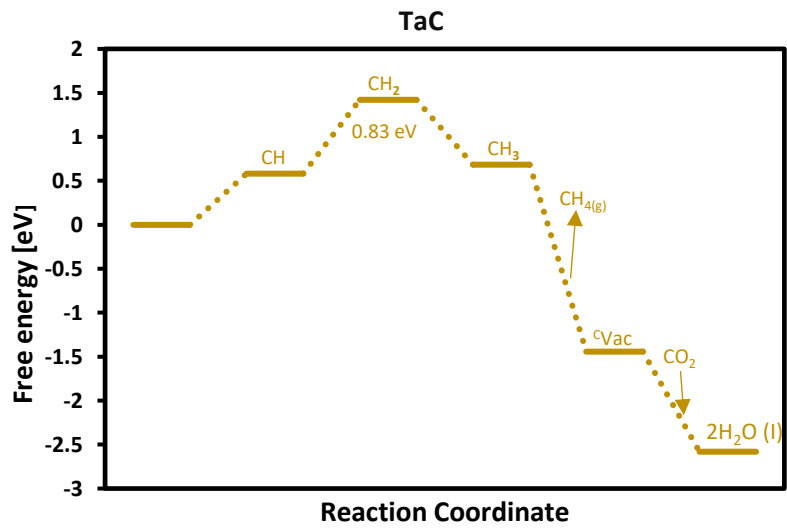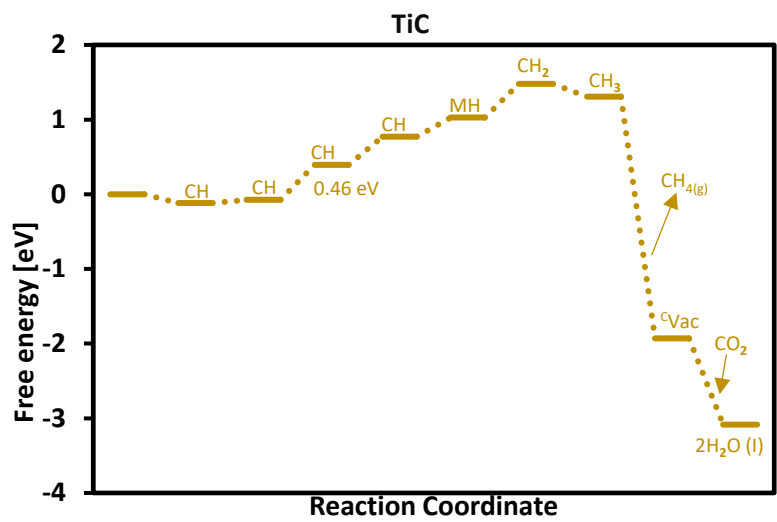

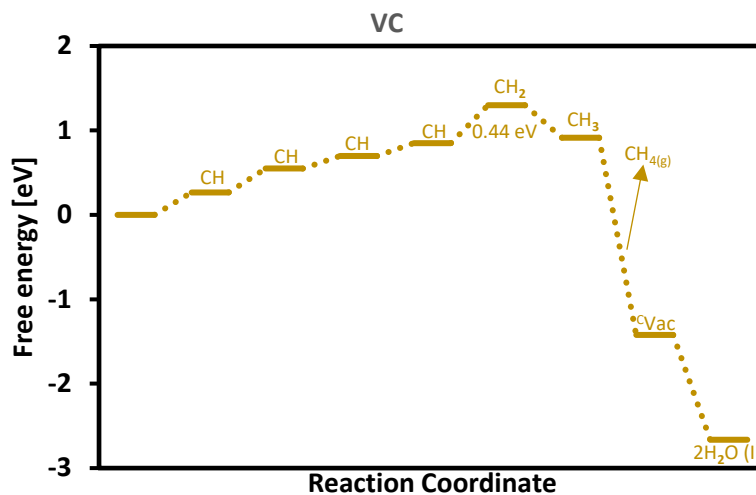

Fig S1: Methane formation free energy diagrams via the MvK mechanism

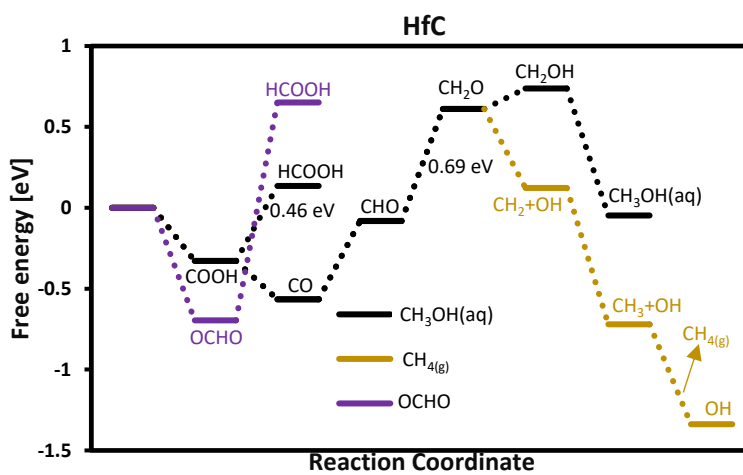

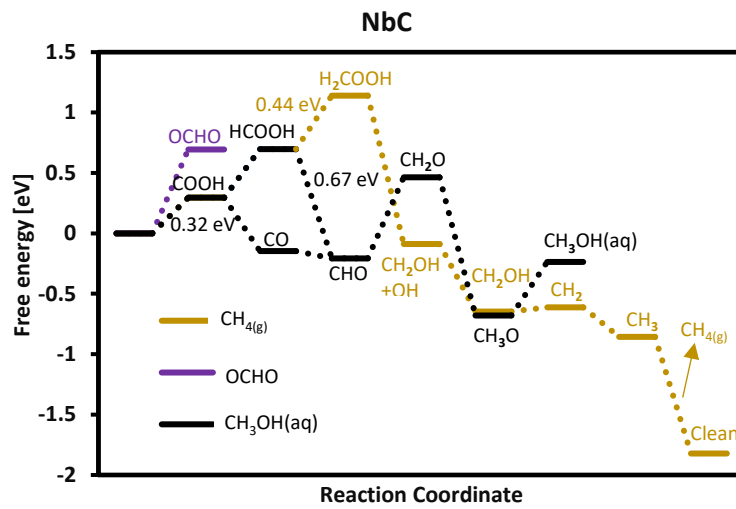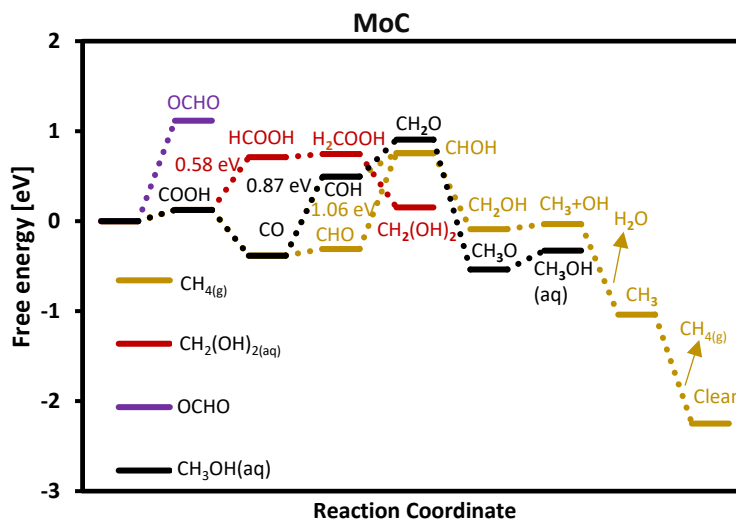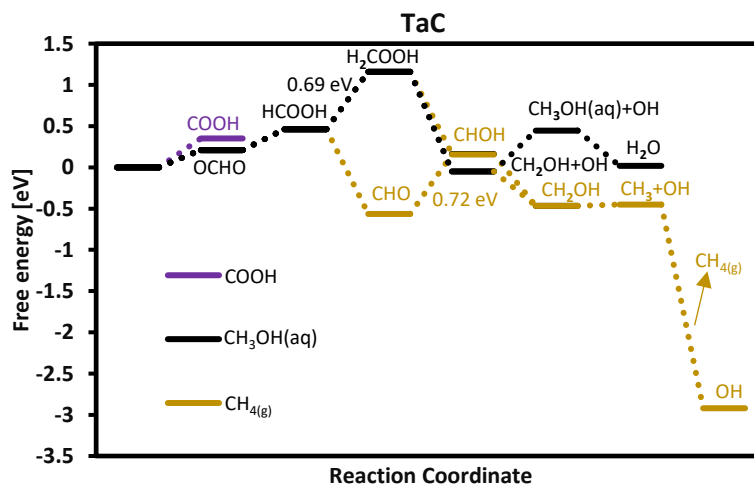

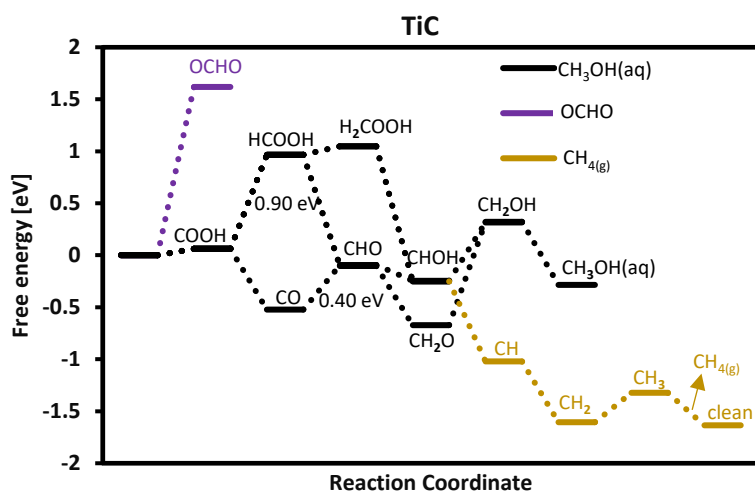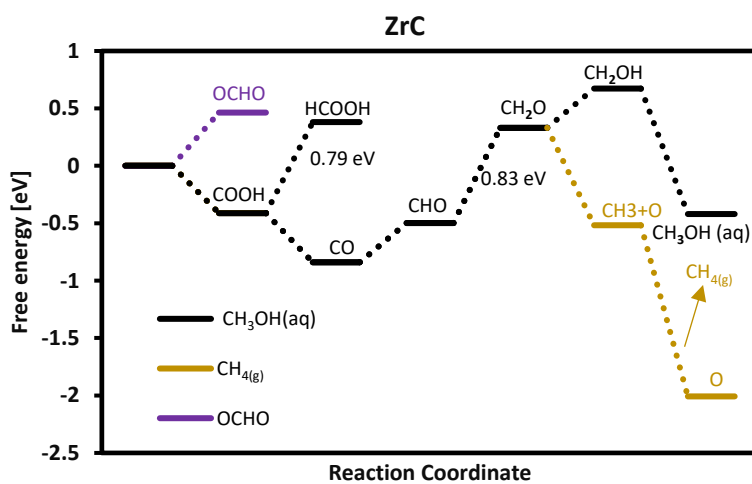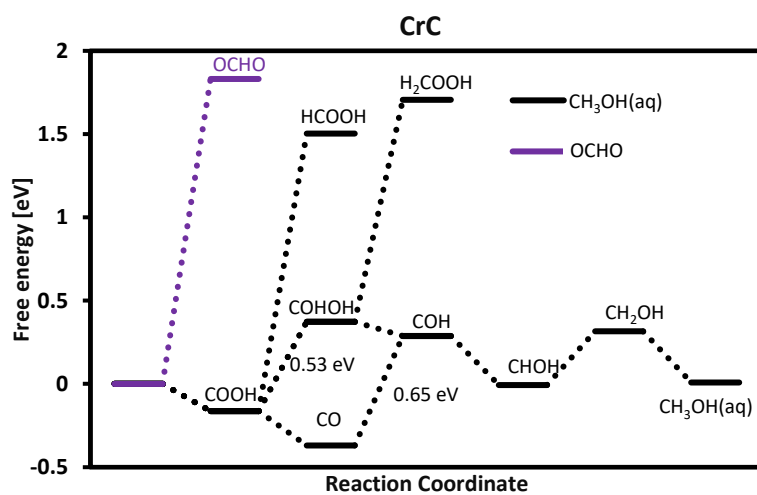

**Fig S2: Formic acid, Methanol, methanediol and Methane formation free energy diagrams via the conventional mechanism.**

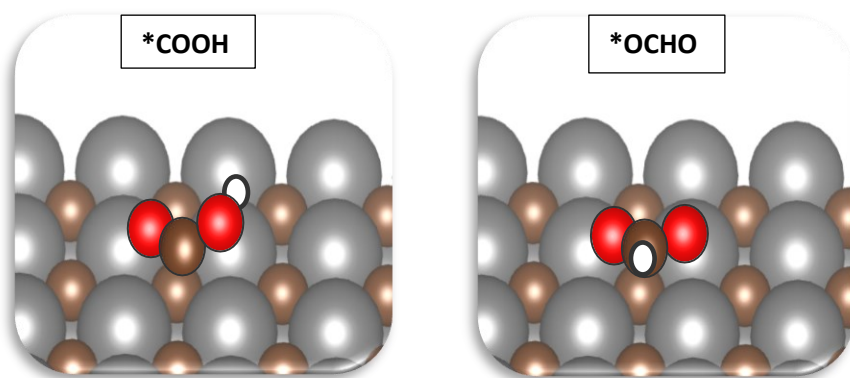

Fig S3: Schematic diagram of adsorption of COOH and OCHO on the carbon site. Red color indicates the Oxygen atoms, white hydrogen atoms, brown carbon atoms and gray indicates the metal atoms.

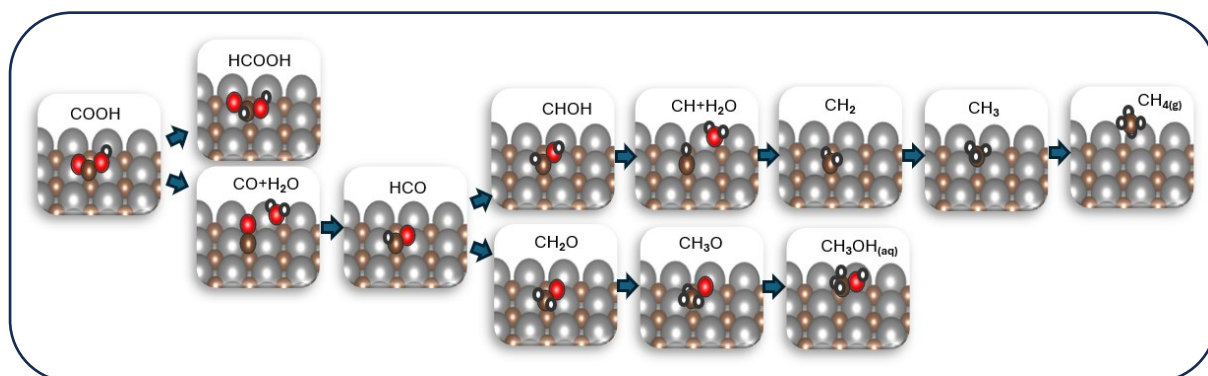

Fig S4: Configuration of formation of formic acid, methanol, and methane on WC catalyst. Silver, brown, red, and white colors indicate the metal, carbon, oxygen, and hydrogen atoms.

Table S1: Calculated each intermediate's Gibbs free energy  $\Delta G$  (eV). The sign of (-) denotes that these intermediates are not formed on these catalysts.

|            | (ΔG)  | (ΔG)  | (ΔG)  | (ΔG)  | (ΔG)     | (ΔG)                | (ΔG)                              | (ΔG) | (ΔG)  | (ΔG)  | (ΔG)              | (ΔG)               | (ΔG)                      | (ΔG)                                    | (ΔG)                | (ΔG)                                  | (ΔG)              | (ΔG)               | (ΔG)  | (ΔG) |
|------------|-------|-------|-------|-------|----------|---------------------|-----------------------------------|------|-------|-------|-------------------|--------------------|---------------------------|-----------------------------------------|---------------------|---------------------------------------|-------------------|--------------------|-------|------|
| Catalyst   | COOH  | OCHO  | CO    | HOCOH | HCOOH    | H <sub>2</sub> COOH | CH <sub>2</sub> (OH) <sub>2</sub> | COH  | CHO   | CHOH  | CH <sub>2</sub> O | CH <sub>2</sub> OH | CH <sub>2</sub> OH+<br>OH | CH <sub>2</sub> OH+<br>H <sub>2</sub> O | CH <sub>3</sub> +OH | CH <sub>3</sub> +<br>H <sub>2</sub> O | CH <sub>3</sub> O | CH <sub>3</sub> OH | CH    | MH   |
| <b>CrC</b> | -0.16 | 1.83  | -0.21 | 0.54  | 1.67     | 1.17                | -                                 | 0.28 | 0.28  | 0.24  | 0.37              | 0.07               | -                         | 0.07                                    | -                   | -                                     | -0.61             | -0.06              | -0.27 | 0.66 |
| <b>HfC</b> | -0.32 | -0.69 | -0.24 | 1.51  | 0.46     | -0.28               | -                                 | 0.91 | 0.16  | 0.89  | 0.46              | 0.28               | -                         | -                                       | -0.39               | -0.95                                 | -                 | -0.33              | -0.20 | 1.60 |
| <b>MoC</b> | 0.12  | 1.11  | -0.51 | 0.88  | 0.59     | 0.16                | -0.01                             | 1.00 | 0.20  | -0.25 | -0.10             | 0.16               | -                         | -                                       | -0.19               | -0.84                                 | -0.44             | 0.11               | 0.05  | 0.75 |
| <b>ScC</b> | -1.08 | -     | -1.55 | 0.86  | 1.21     | 0.48                | -                                 | 1.83 | 0.92  | -     | -                 | -                  | -                         | -                                       | -                   | -                                     | -                 | -                  | -1.08 | -    |
| <b>YC</b>  | -2.20 | -     | -1.43 | 1.08  | unstable | 0.47                | -                                 | 1.33 | 1.33  | -0.17 | 0.96              | 0.75               | -                         | -                                       | -                   | -                                     | -                 | -                  | -1.19 | -    |
| <b>NbC</b> | 0.30  | 0.69  | -0.44 | 1.06  | 0.40     | 0.74                | -                                 | 1.06 | 0.24  | 0.43  | 0.23              | 0.18               | -0.83                     | 0.18                                    | -                   | -                                     | -0.91             | 0.67               | 0.39  | 0.67 |
| <b>ZrC</b> | -0.41 | 0.46  | -0.43 | 1.53  | 0.79     | -0.28               | -0.30                             | 0.59 | -0.07 | 0.67  | 0.40              | 0.27               | -                         | -                                       | -                   | -                                     | -0.30             | -0.69              | -0.27 | -    |
| <b>TaC</b> | 0.21  | 0.35  | -0.60 | 1.71  | 0.25     | 0.91                | -                                 | 2.59 | 0.77  | 0.97  | 0.51              | 0.57               | -0.96                     | 0.49                                    | -0.94               | -                                     | unstable          | -0.51              | 0.58  | 0.37 |
| <b>TiC</b> | 0.06  | 1.62  | -0.58 | 0.90  | 0.90     | 0.14                | -                                 | 1.09 | 0.47  | 0.75  | 0.32              | -0.01              | -                         | -                                       | -                   | -                                     | cal..             | -0.27              | -0.11 | -    |
| <b>WC</b>  | 0.22  | 0.58  | -0.08 | 0.97  | 0.31     | 0.83                | -                                 | 0.68 | -0.21 | 0.61  | 0.29              | -0.04              | -                         | -                                       | -                   | -                                     | -0.63             | -0.43              | -0.08 | 0.38 |
| <b>VC</b>  | 0.60  | -0.16 | -0.83 | 1.08  | -0.06    | -0.11               | -                                 | 1.15 | 0.43  | 0.14  | 0.25              | 0.04               | -                         | -                                       | -                   | -                                     | -0.56             | 0.18               | 0.26  | 0.90 |
